# Supplementary material for: A PLENA-like gene of peach is involved in carpel formation and subsequent transformation into a fleshy fruit
Source: PubMed Central journal article supplement — J Exp Bot. 2009 Feb;60(2):651–61. doi: 10.1093/jxb/ern313 (PMC2651465; doi:10.1093/jxb/ern313), 2009-02
Supplement: ern313_1.pdf [file ern313_1.pdf]

1 **SUPPLEMENTARY MATERIAL OF:**

2

3 **A *PLENA*-like gene of peach is involved in carpel formation and**  
4 **subsequent transformation into a fleshy fruit.**

5

6 **Alice Tadiello\*, Anna Pavanello\*, Dario Zanin\*, Elisabetta Caporali<sup>o</sup>, Lucia**  
7 **Colombo<sup>o</sup>, Giuseppe L. Rotino<sup>^</sup>, Livio Trainotti\* and Giorgio Casadoro\***

8

9 *\*) Dipartimento di Biologia, Università di Padova, 35131 Padova, Italy*

10 *o) Dipartimento di Biologia, Università di Milano, 20133 Milano, Italy*

11 *^) Istituto Sperimentale Orticoltura, 26836 Montanaso Lombardo, Lodi, Italy*

12

13 **Running title:** Characterisation of a *PLENA*-like gene from peach.

14

15

16 Prof. Giorgio Casadoro

17 Dipartimento di Biologia,

18 Università di Padova,

19 Via G. Colombo 3,

20 I-35131 PADOVA

21 Italy

22 Tel: 0039 049 8276291

23 Fax: 0039 049 8276280

24 E-mail: giorgio.casadoro@unipd.it

25

1 **Legend to supplementary figures**

2

3 **Supplementary fig. 1.** Structural comparison of some C-type MADS-box genes.  
4 Rectangles represent exons while the lines among blocks represent introns. In red are  
5 depicted the coding sequences, while the non-coding part of the transcribed regions (5'  
6 and 3' UTRs) are in grey. Peach genes (*PpFAR* and *PpPLE*) are highlighted by a peach  
7 background. Other gene structures are: *AmFAR* and *AmPLE*: *Antirrhinum majus*  
8 *FARINELLI* and *PLENA*, respectively; *AG*, *SHP1* and *SHP2*: *Arabidopsis AGAMOUS*,  
9 *SHATTERPROOF1* and *SHATTERPROOF2*, respectively.

10

11

12 **Legend to supplementary tables**

13

14 **Supplementary Table 1:** sequences of the oligonucleotides used in qRT-PCR  
15 experiments. All the considered genes are tomato-specific but for the last two that are  
16 the peach C-type MADS-box described in this paper. Acronyms are as in Figures. In the  
17 last column the GenBank accession numbers are reported.

18

19 **Supplementary Table 2.** Table showing the amino acid sequence identities among C-  
20 type MADS-box transcription factors from *Arabidopsis* (*AG*, *SHP1* and *SHP2*:  
21 *AGAMOUS*, *SHATTERPROOF1* and *SHATTERPROOF2*, respectively), **snapdragon**  
22 (*AmFAR* and *AmPLE*: *FARINELLI* and *PLENA*), **tomato** (*TAG1* and *TAGL1*) and  
23 **peach** (*PpFAR* and *PpPLE*). Sequences of the *AGAMOUS/FARINELLI* clade have been  
24 highlighted in green, those belonging to the *PLENA* group in yellow while the two  
25 *SHATTERPROOF* genes have been left in white. Data have been obtained from a

- 1 multiple alignment performed using the ClustalW algorithm with a Gonnet 250 protein
- 2 weight matrix.
- 3
- 4
- 5
- 6

1 Supplementary figure 1

2

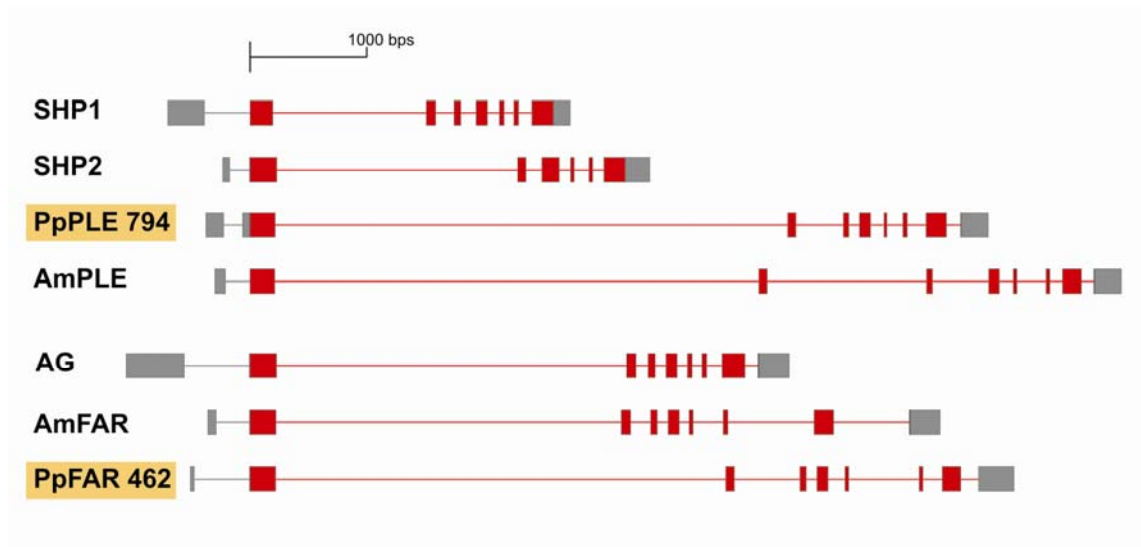

3

1 Supplementary table 1

2

| Gene name                                   | oligo for name   | sequence of oligo for    | oligo rev name   | sequence of oligo rev    | GenBank Acc. Nos.        |
|---------------------------------------------|------------------|--------------------------|------------------|--------------------------|--------------------------|
| ACT: actin                                  | ACT_FOR          | AGGCACCCCTTAATCCCAAG     | ACT_REV          | AAGCACAGCCTGGATAGCAAC    | <a href="#">AB199316</a> |
| ACO1: ACC-oxidase                           | ACO1_FOR         | TCATACAGACGCAGGAGGCA     | ACO1_REV         | GCATGGGAGGAACATCGATC     | <a href="#">X04792</a>   |
| CAB4: major chlorophyll a/b binding protein | CAB_FOR          | GCACTGTAAAAGCGCTCCTCAA   | CAB_REV          | GTCCAGCAGTGTCCCATCCGTAAT | <a href="#">M14443</a>   |
| EXP: expansin                               | EXP_FOR          | ATTACGCGTTGCCAAATGACA    | EXP_REV          | AGCGCGGTAAGGCAAGTT       | <a href="#">U82123</a>   |
| $\beta$ -GAL 4: $\beta$ -galactosidase      | $\beta$ -GAL_FOR | CTACTGCGAAGGGTTCCGTC     | $\beta$ -GAL_REV | TTTGAGGAATTGGACCACCG     | <a href="#">AF020390</a> |
| XET: xyloglucan endo-transglycosylases      | XET_FOR          | CACGAAAAGCTTGGTGTTC      | XET_REV          | TTCACTCGCCCTCCTTGTGT     | <a href="#">X82685</a>   |
| PG: endo-polygalacturonase                  | PG_FOR           | GAGGAACTATCAATGGCAATGGA  | PG_REV           | CCAGAAGGTTAAGGCCGTTG     | <a href="#">X04583</a>   |
| PL: pectate lyase                           | PL_FOR           | ATCGTGTGGTACCGGAAATCC    | PL_REV           | TCCCAAATCCAATTGCACAGT    | <a href="#">BT012714</a> |
| PME: pectin methyl esterases                | PME_FOR          | CCCTCTGGTGGTTCGCCTA      | PME_REV          | GATTGCATGGTGGCCTCATC     | <a href="#">Les.7241</a> |
| PSY1: phytoene synthase                     | PSY1_FOR         | CGTTTTTTTGTTCATCGAGGC    | PSY1_REV         | CGTACAGAAAATTTCCGTCCATT  | <a href="#">M84744</a>   |
| RIN: ripening inhibitor                     | RIN_FOR          | AAACATCATGGCATTGTGGTGAGC | RIN_REV          | ATGGTGCTGCATTTTCGGGTTGTA | <a href="#">AF448522</a> |
| TAG1: agamous                               | TAG1_FOR         | AAGGAACTAGGAAGGGGAAAAT   | TAG1_REV         | AACCAAAGCAACCTCAGCATCACA | <a href="#">AY098733</a> |
| TAGL1: agamous like                         | TAGL1_FOR        | TCAGCCAAATTACGAAGATGC    | TAGL1_REV        | AAGCTGGAGAGGAGTTTGGTCA   | <a href="#">AY098735</a> |
| NOR: non ripening                           | NOR_FOR          | ACGATGCATGGAGTTTGTATTG   | NOR_REV          | TTAAGTCCATCGTCTCGTTGTTC  | <a href="#">AY573802</a> |
| CNR: colorless non ripening                 | CNR_FOR          | AACAAATGGGAAGGGAAGAGAAGC | CNR_REV          | GCACTGATCGACCTGGCAAGAA   | <a href="#">DQ672601</a> |
| PpFAR (MADS462)                             | TF 12            | AGCTGGTTGTTGTTATGC       | TF 43            | TGGGCGAGTCAATGAGTTCTAT   | <a href="#">Ppe.1710</a> |
| PpPLE (MADS794)                             | TF 54            | GGCACAACAGCAGCAAACAA     | TF 55            | CGCCTCCAAGATTACAGGGA     | <a href="#">Ppe.2689</a> |

3

1 Supplementary table 2

2

|       | PpPLE | PpFAR | Ple  | Far  | TAG1 | TAGL1 | AG   | SHP1 | SHP2 |
|-------|-------|-------|------|------|------|-------|------|------|------|
| PpPLE |       | 70.6  | 75.9 | 68.4 | 70.9 | 72.0  | 66.4 | 73.0 | 70.0 |
| PpFAR |       |       | 69.7 | 72.5 | 73.8 | 65.8  | 72.3 | 68.2 | 64.2 |
| Ple   |       |       |      | 69.4 | 68.9 | 73.1  | 65.5 | 68.5 | 65.4 |
| Far   |       |       |      |      | 80.4 | 66.8  | 70.4 | 66.7 | 65.3 |
| TAG1  |       |       |      |      |      | 65.7  | 72.5 | 65.7 | 62.3 |
| TAGL1 |       |       |      |      |      |       | 64.2 | 66.7 | 64.5 |
| AG    |       |       |      |      |      |       |      | 63.5 | 59.4 |
| SHP1  |       |       |      |      |      |       |      |      | 85.8 |
| SHP2  |       |       |      |      |      |       |      |      |      |

3

4
